# Supplementary material for: Facile preparation of indoxyl- and nitrophenyl glycosides of lactosamine and isolactosamine
Source: Royal Society of Chemistry journal article supplement (doi:10.1039/c3ra47128d), 2014-01-01

## NMR data

### 4-Nitrophenyl 2-Acetamido-4,6-di-O-acetyl-2-deoxy-3-O-(2,3,4,6-tetra-O-acetyl- $\beta$ -D-galactopyranosyl)- $\beta$ -D-glucopyranoside (4a)

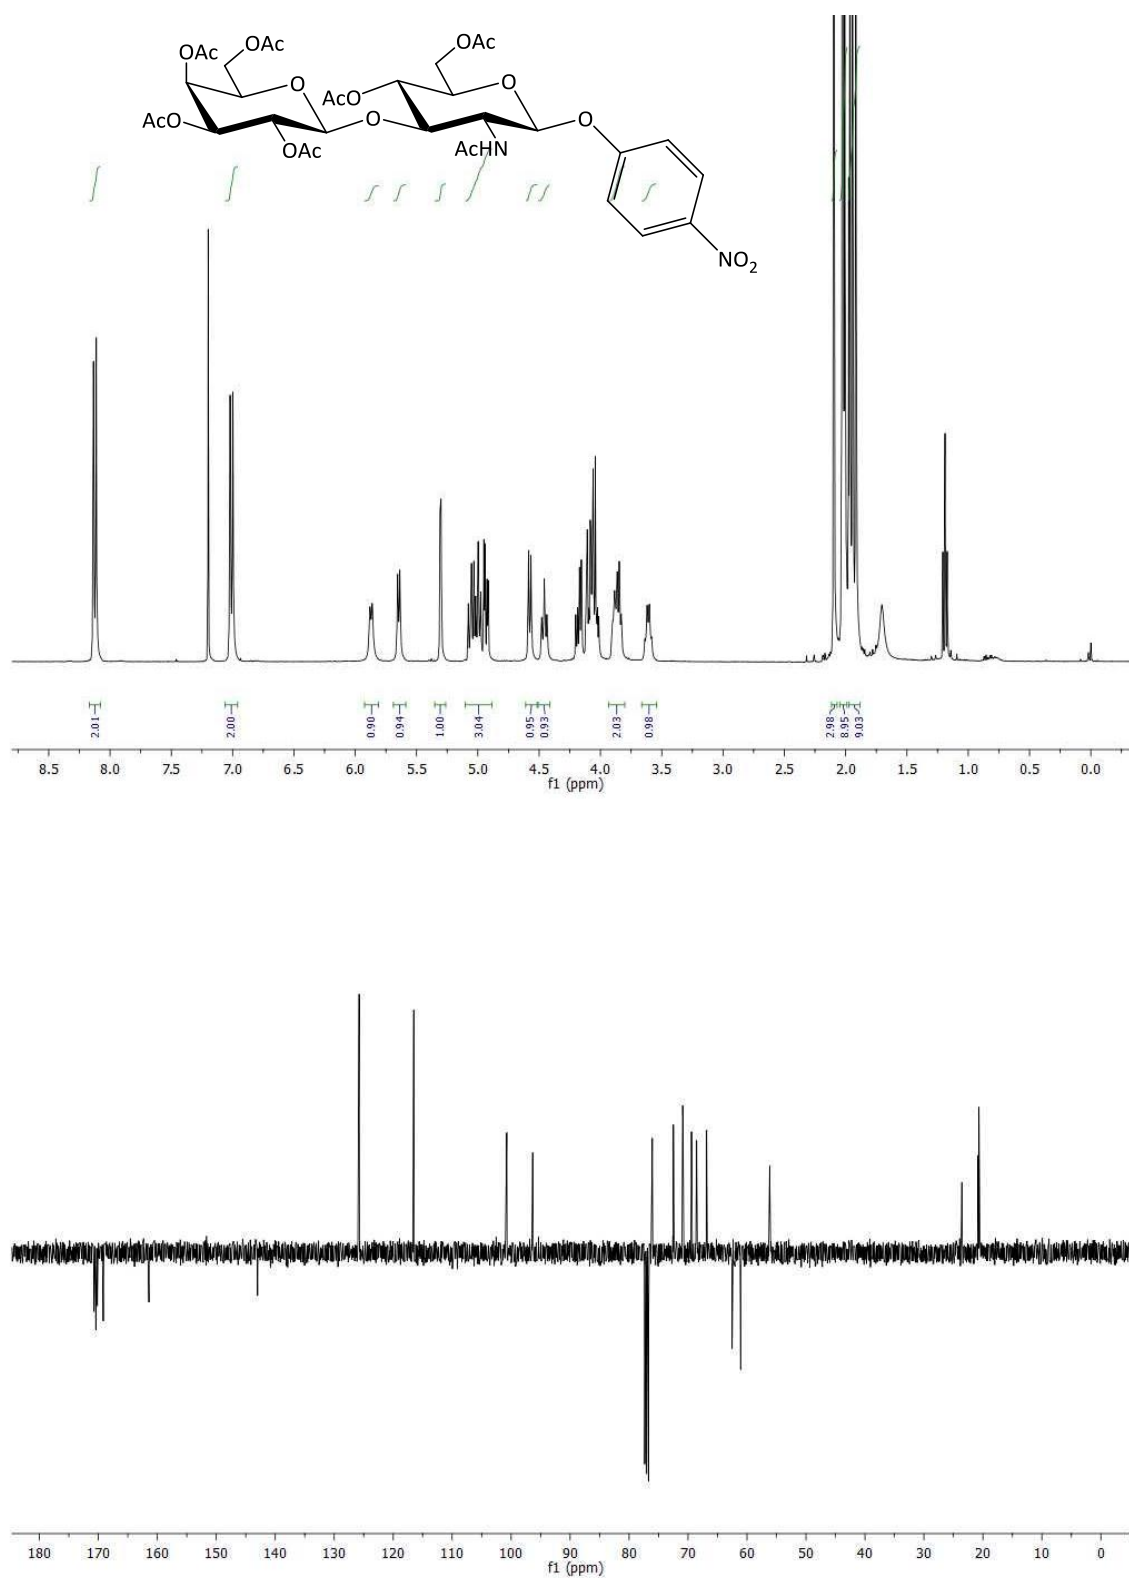

**2-Nitrophenyl 2-Acetamido-4,6-di-O-acetyl-2-deoxy-3-O-(2,3,4,6-tetra-O-acetyl- $\beta$ -D-galactopyranosyl)- $\beta$ -D-glucopyranoside (4b)**

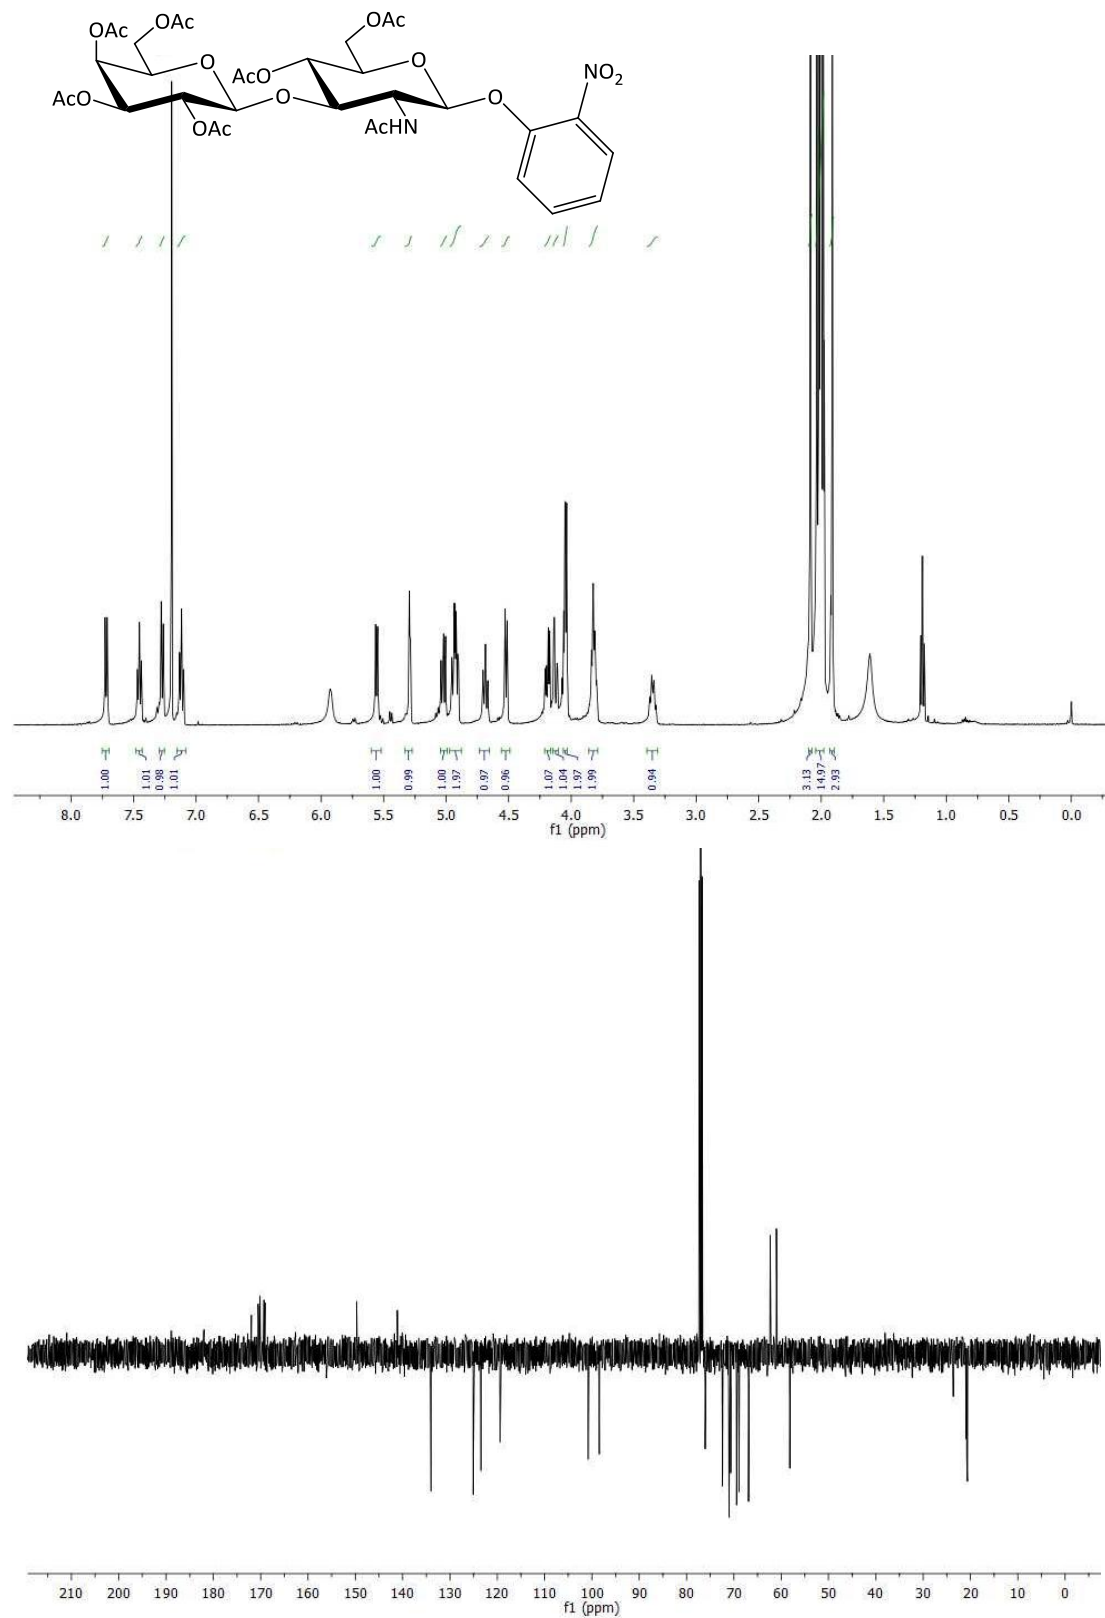

**4-Nitrophenyl 2-Acetamido-3,6-di-O-acetyl-2-deoxy-4-O-(2,3,4,6-tetra-O-acetyl-β-D-galactopyranosyl)-β-D-glucopyranoside (4c)**

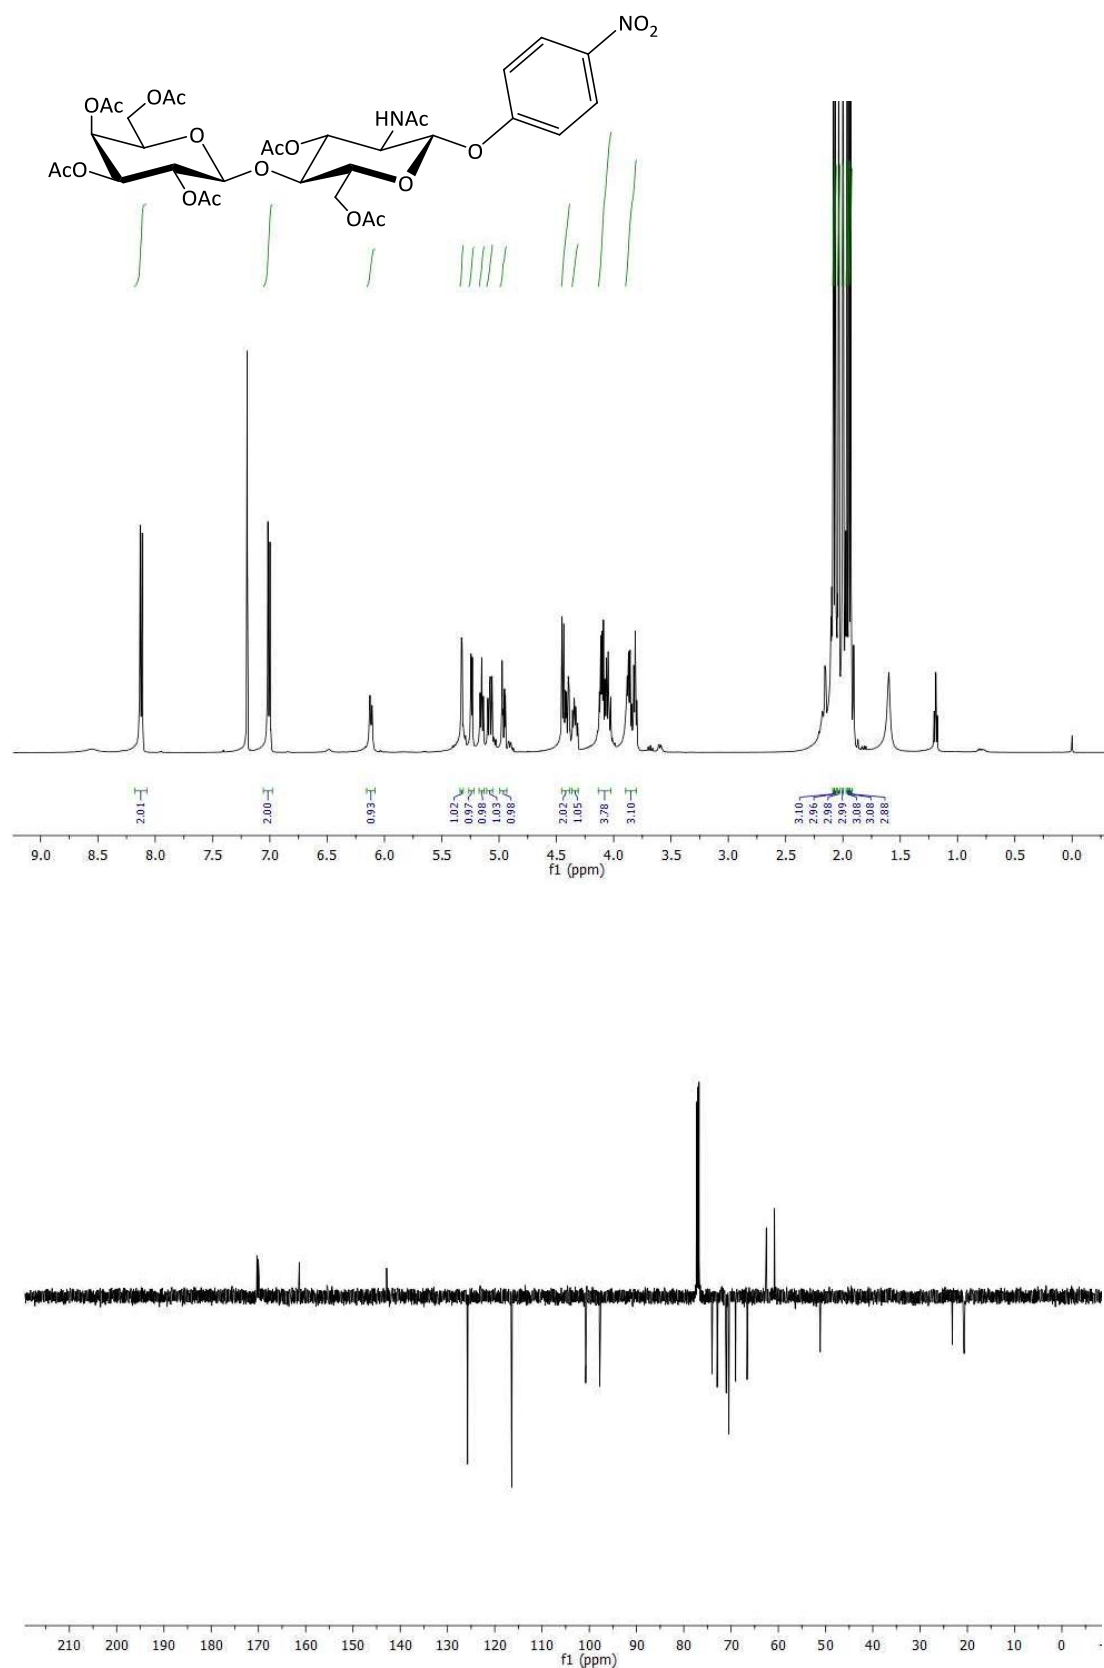

**2-Nitrophenyl 2-Acetamido-3,6-di-O-acetyl-2-deoxy-4-O-(2,3,4,6-tetra-O-acetyl-β-D-galactopyranosyl)-β-D-glucopyranoside (4d)**

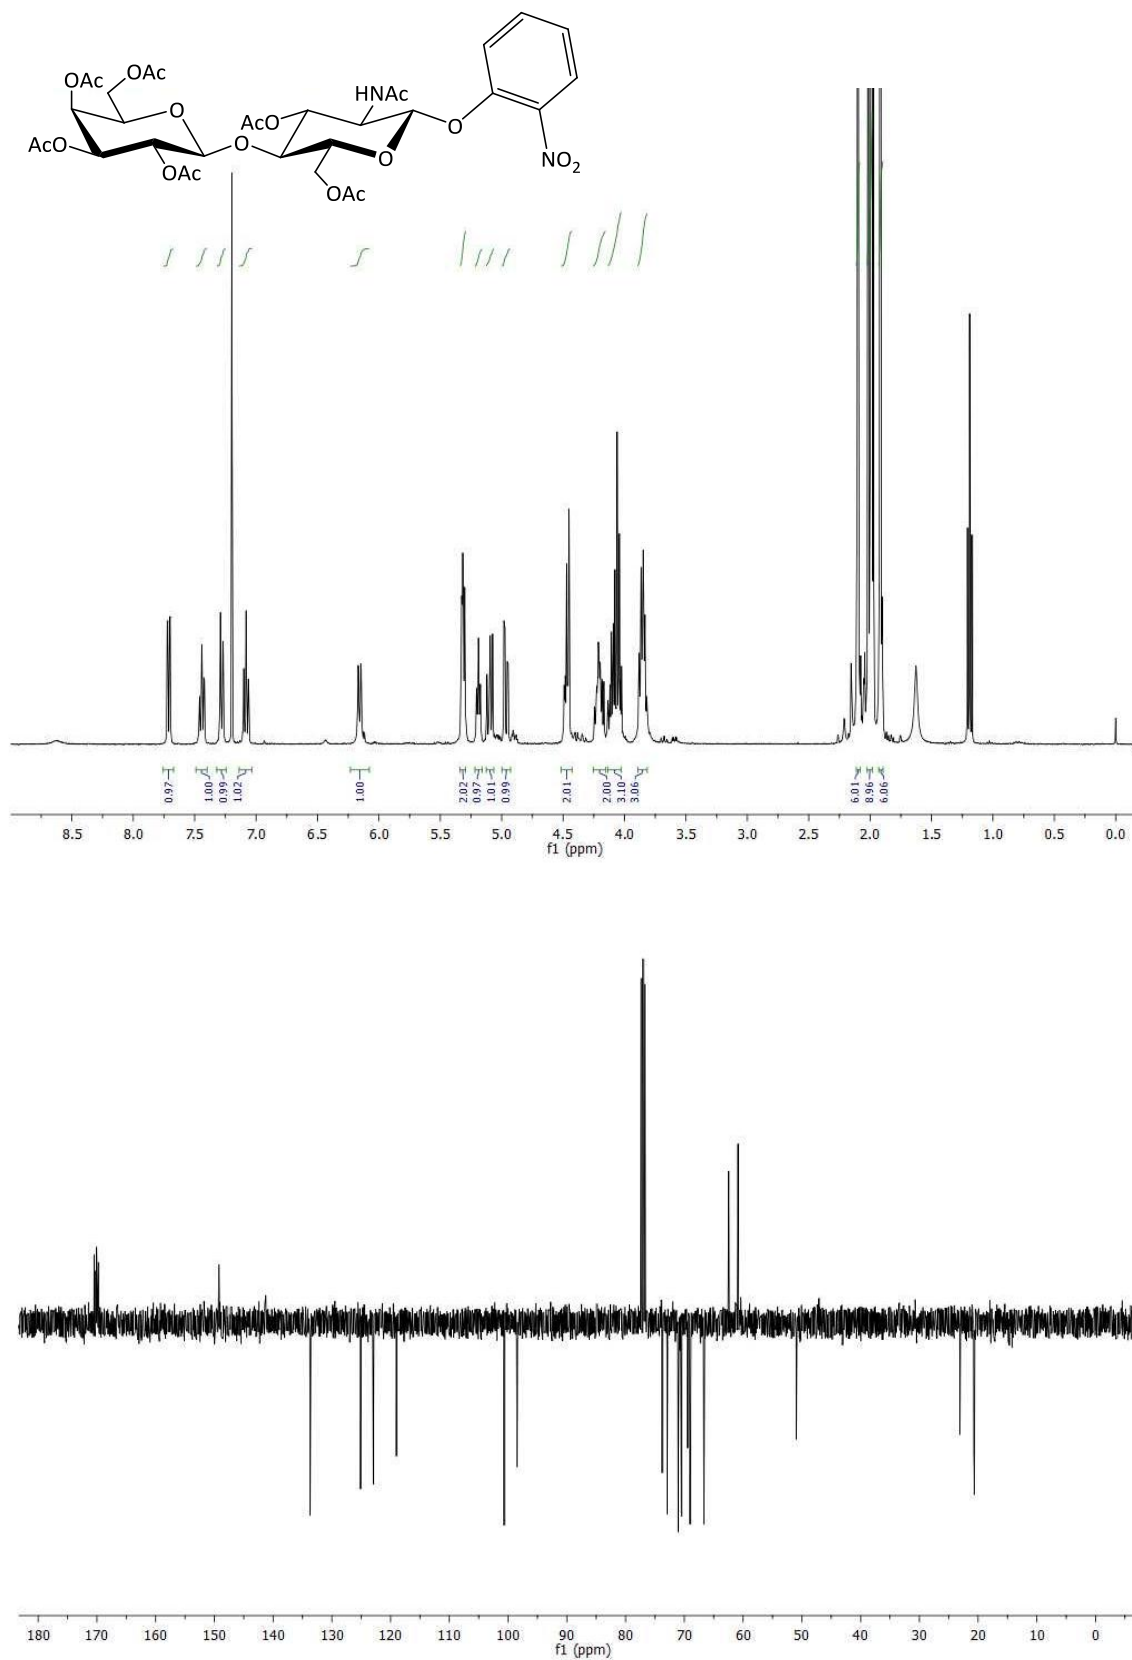

**4-Nitrophenyl 2-Acetamido-2-deoxy-3-O-( $\beta$ -D-galactopyranosyl)- $\beta$ -D-glucopyranoside (5a)**

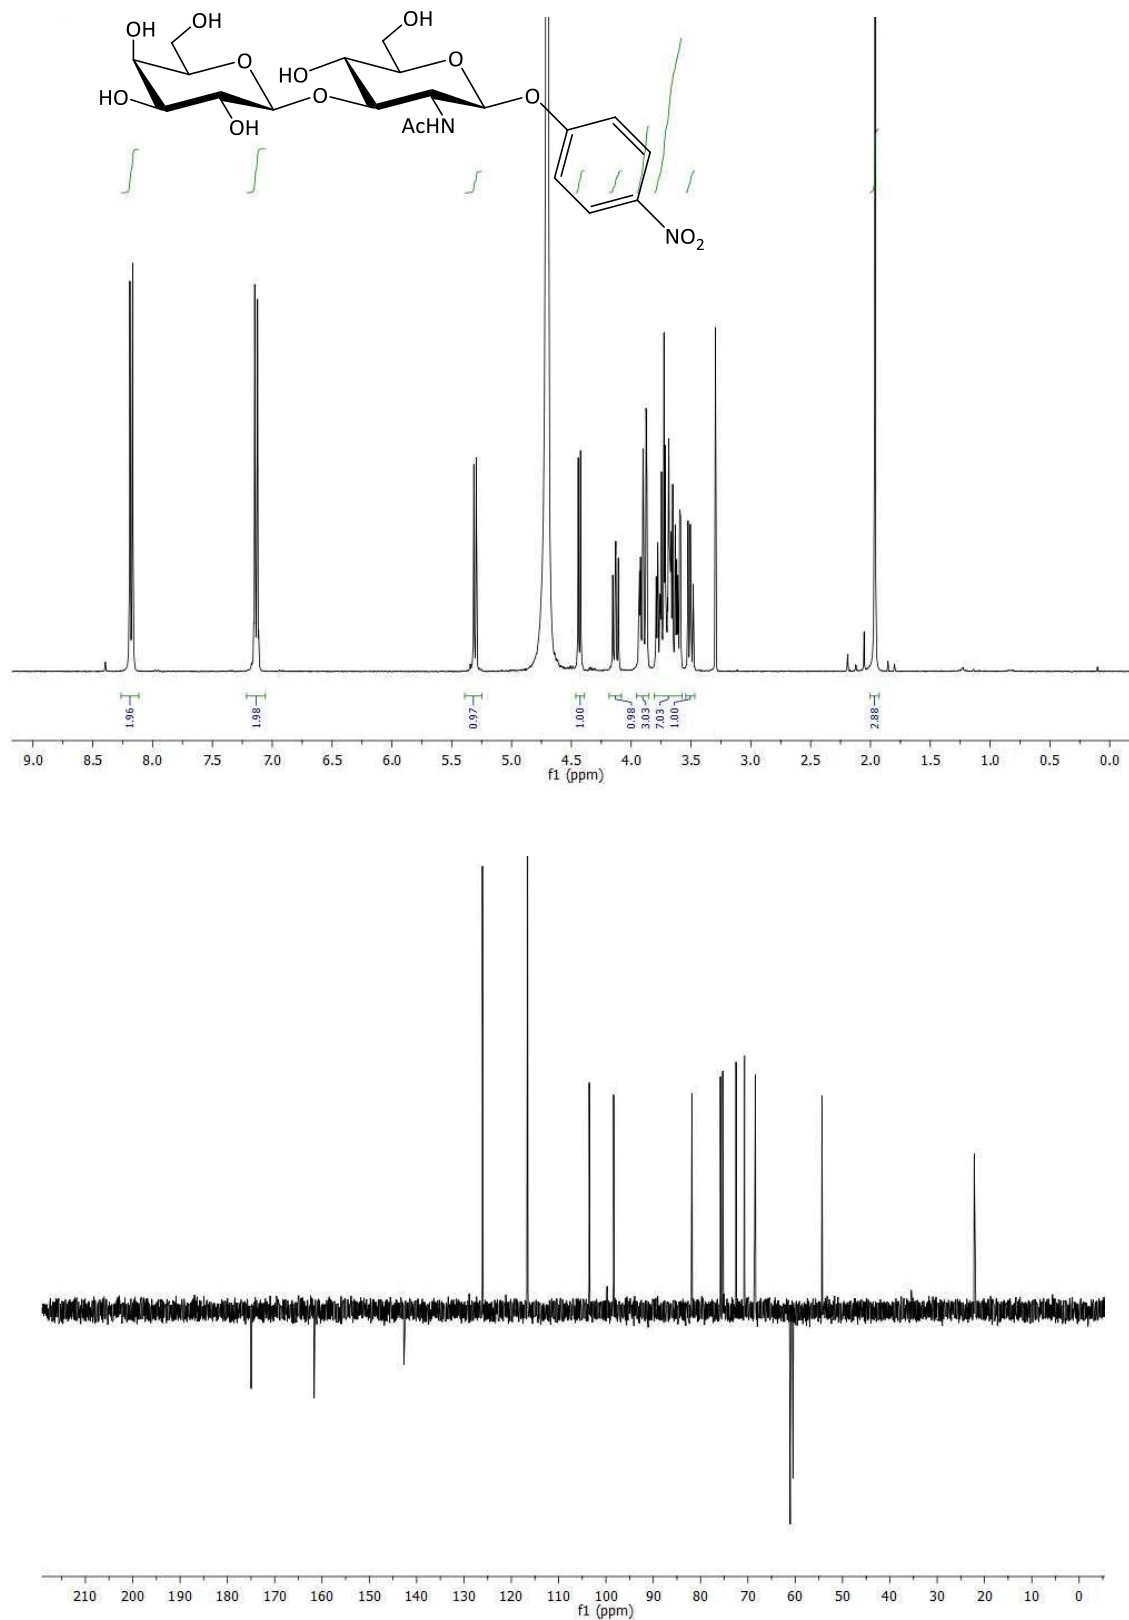

**2-Nitrophenyl 2-Acetamido-2-deoxy-3-O-( $\beta$ -D-galactopyranosyl)- $\beta$ -D-glucopyranoside (5b)**

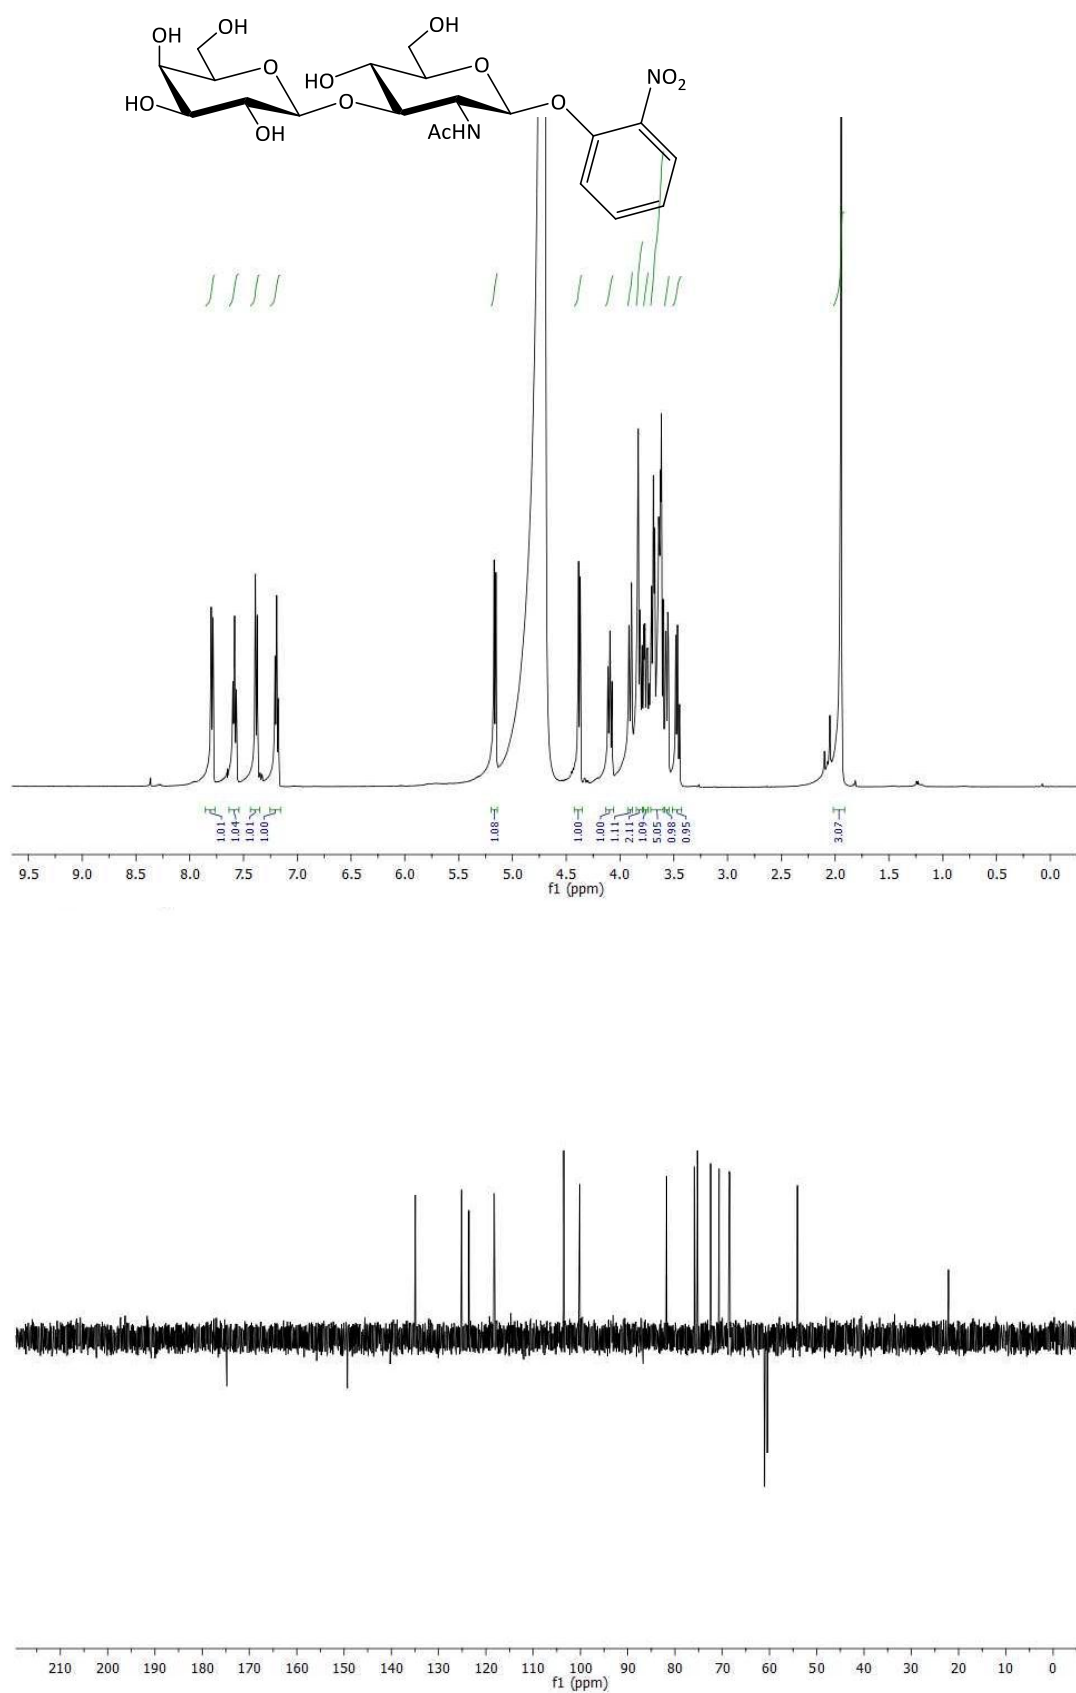

**4-Nitrophenyl 2-Acetamido-2-deoxy-4-O-(β-D-galactopyranosyl)-β-D-glucopyranoside (5c)**

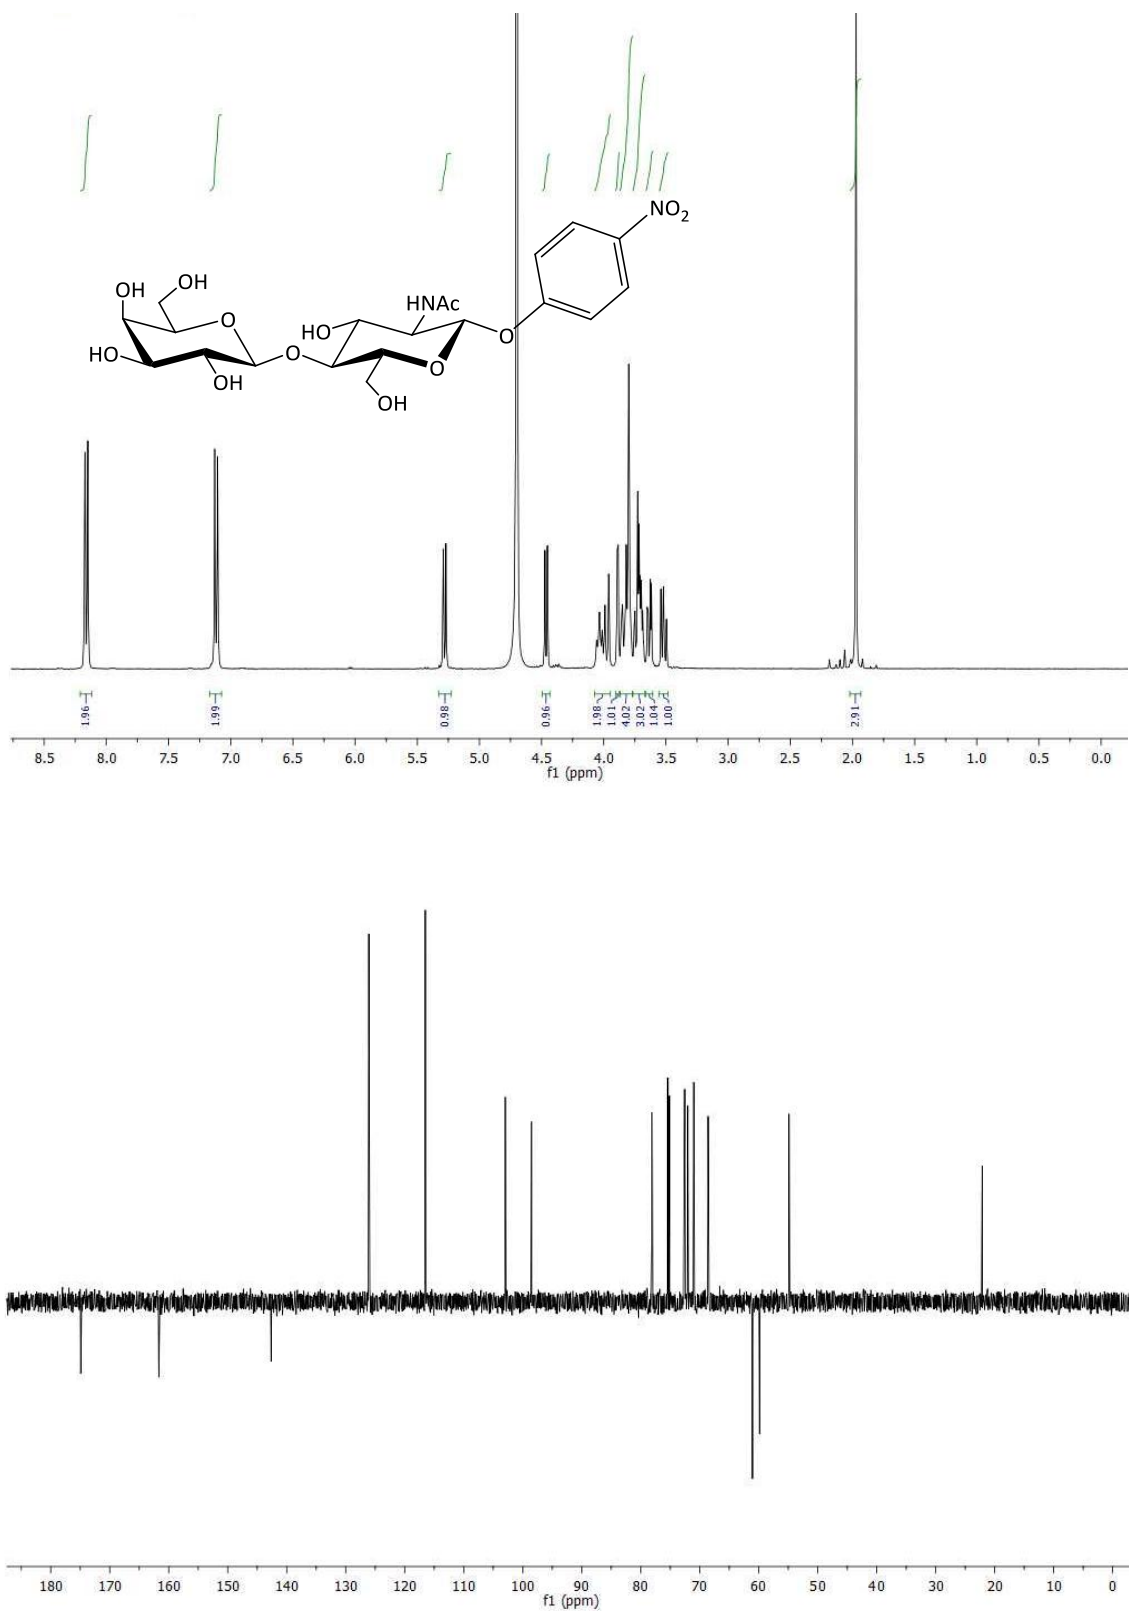

**2-Nitrophenyl 2-Acetamido-2-deoxy-4-O-( $\beta$ -D-galactopyranosyl)- $\beta$ -D-glucopyranoside (5d)**

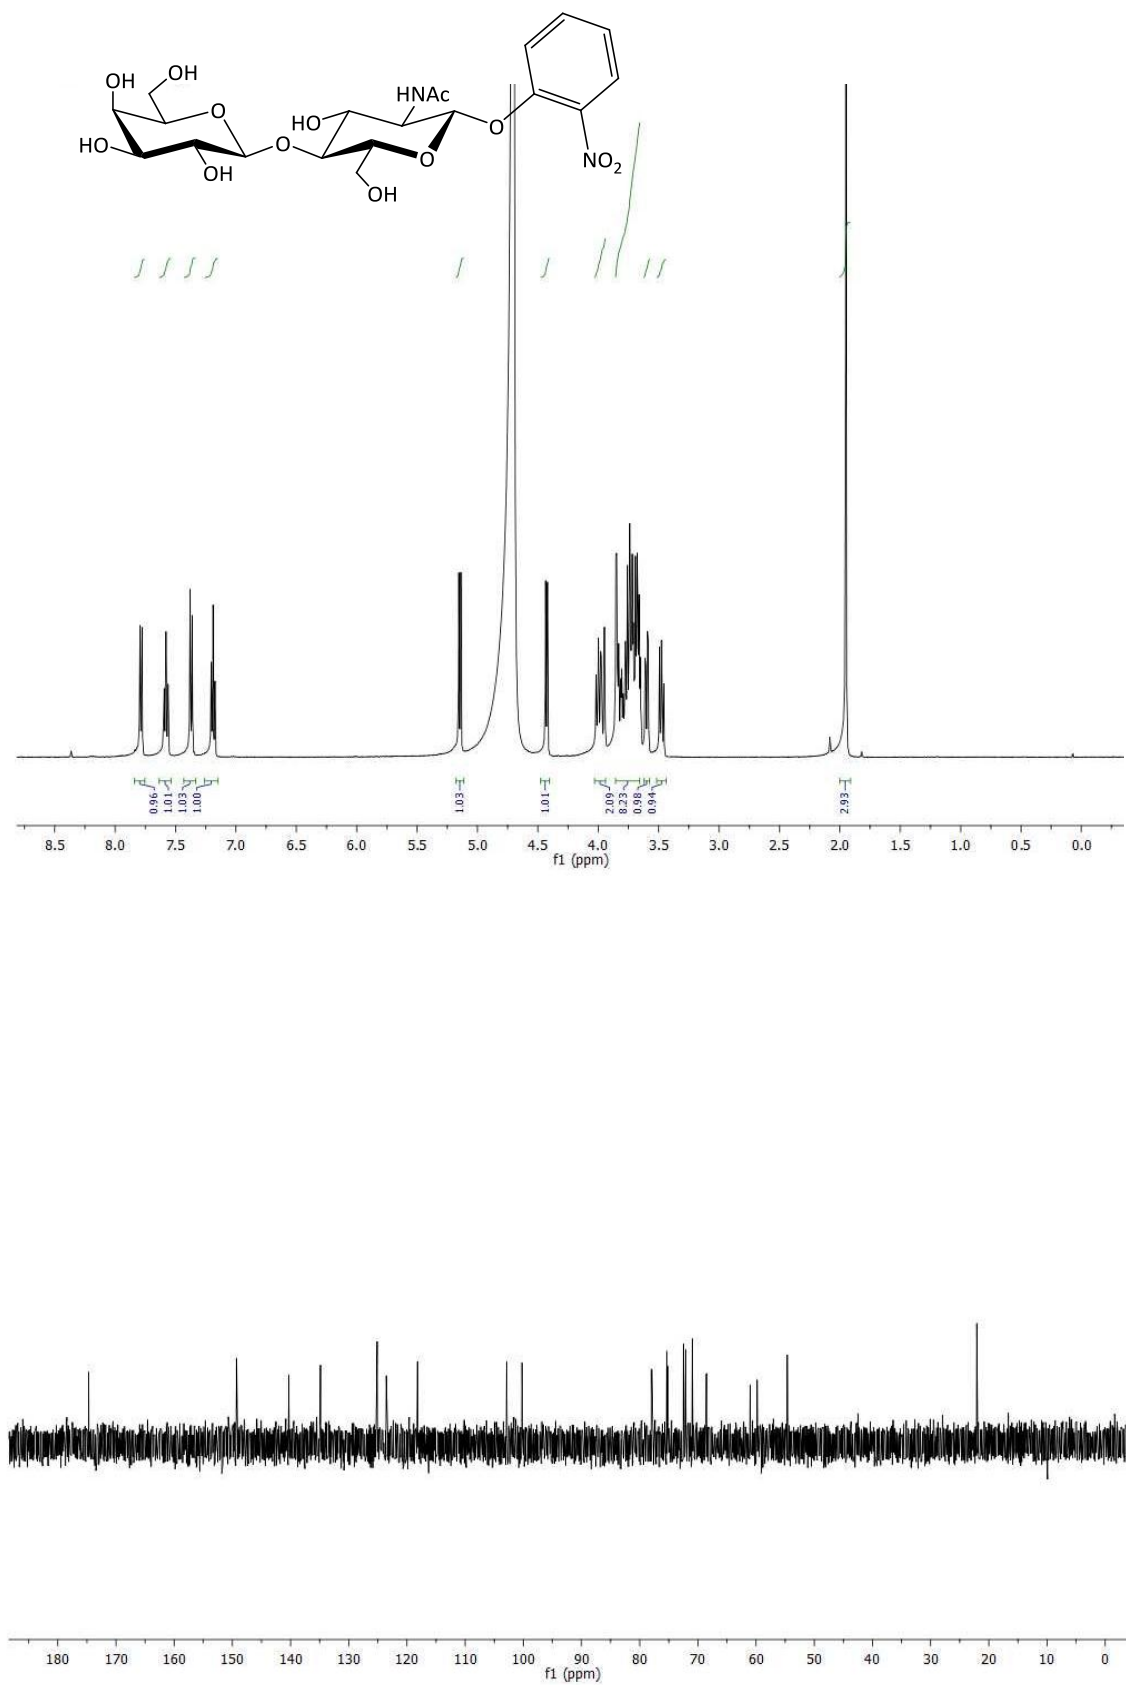



**(5-Bromo-4-chloro-indox-3-ylid acid allyl ester) 2-Acetamido-4,6-di-O-acetyl-2-deoxy-3-O-(2,3,4,6-tetra-O-acetyl- $\beta$ -D-galactopyranosyl)- $\beta$ -D-glucopyranoside**  
**(6a)**

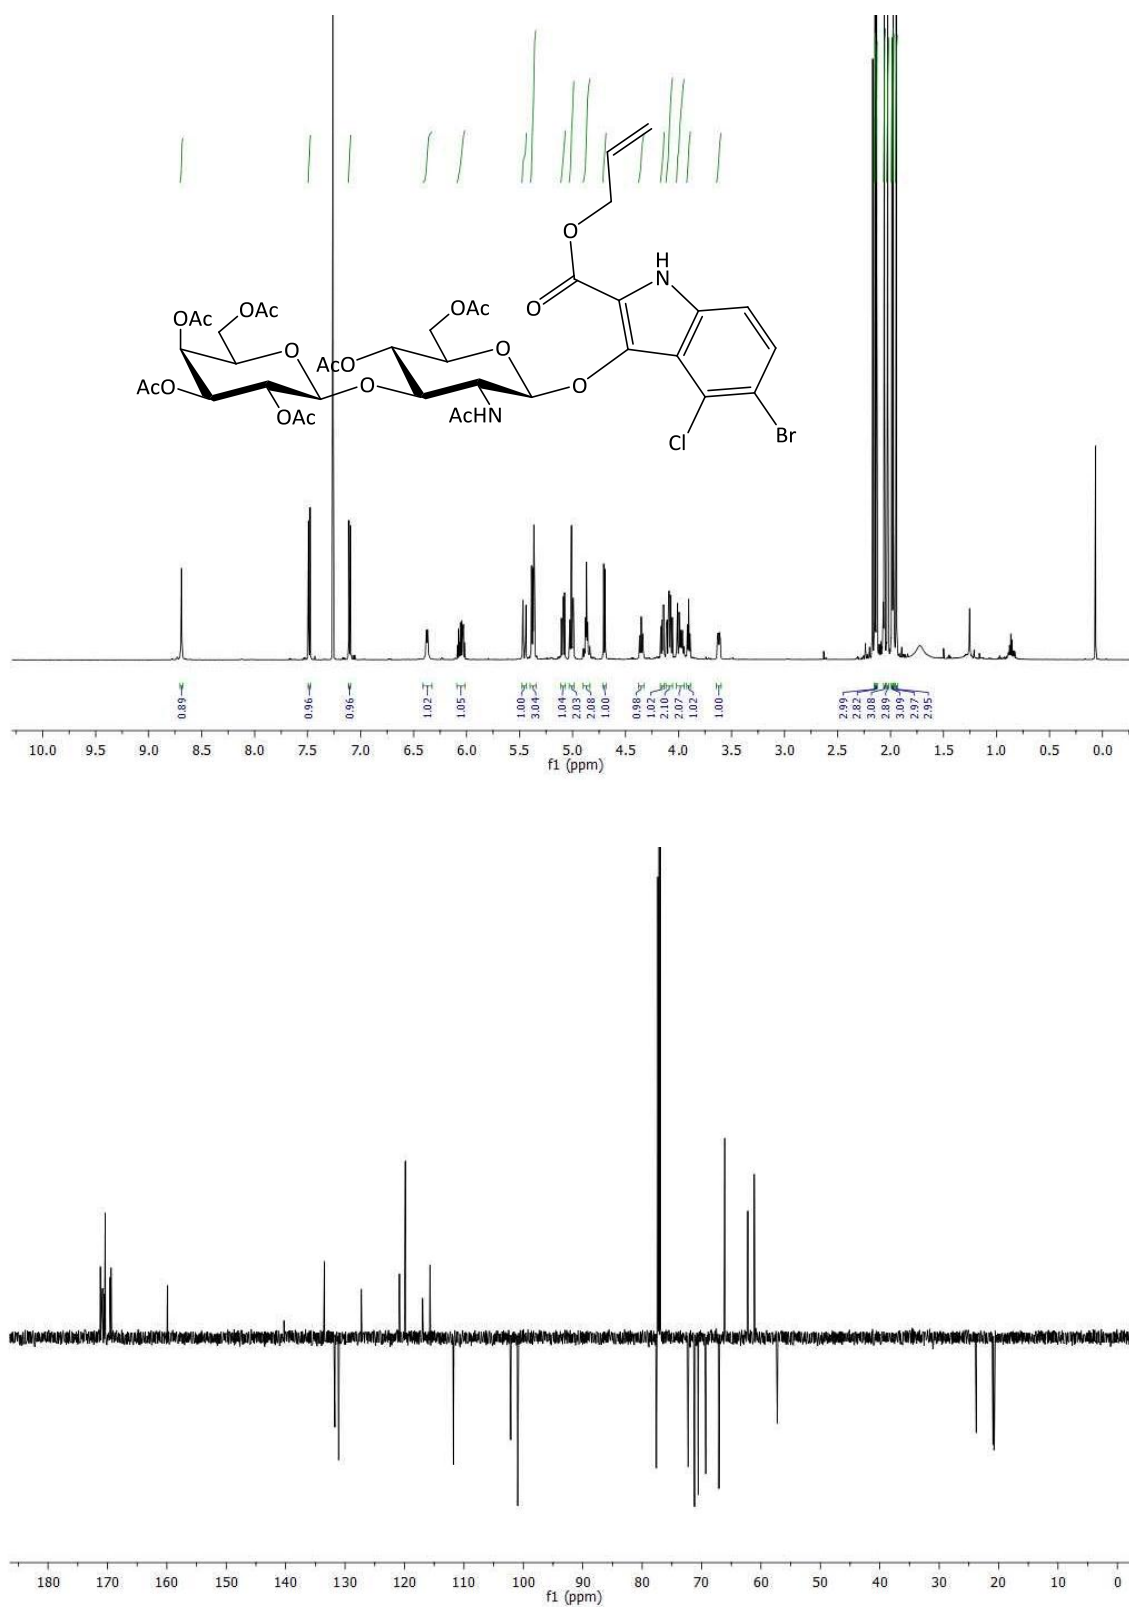

**(5-Bromo-4-chloro-indox-3-ylid acid allyl ester) 2-Acetamido-3,6-di-O-acetyl-2-deoxy-4-O-(2,3,4,6-tetra-O-acetyl-β-D-galactopyranosyl)-β-D-glucopyranoside**

**(6b)**

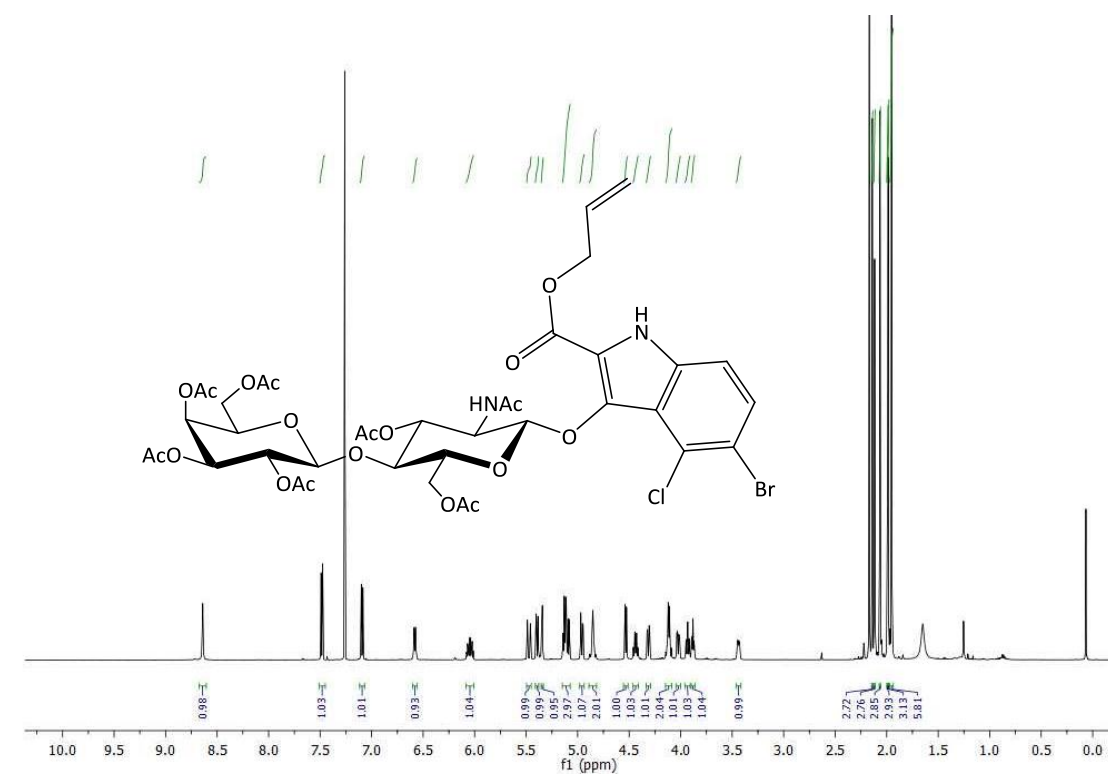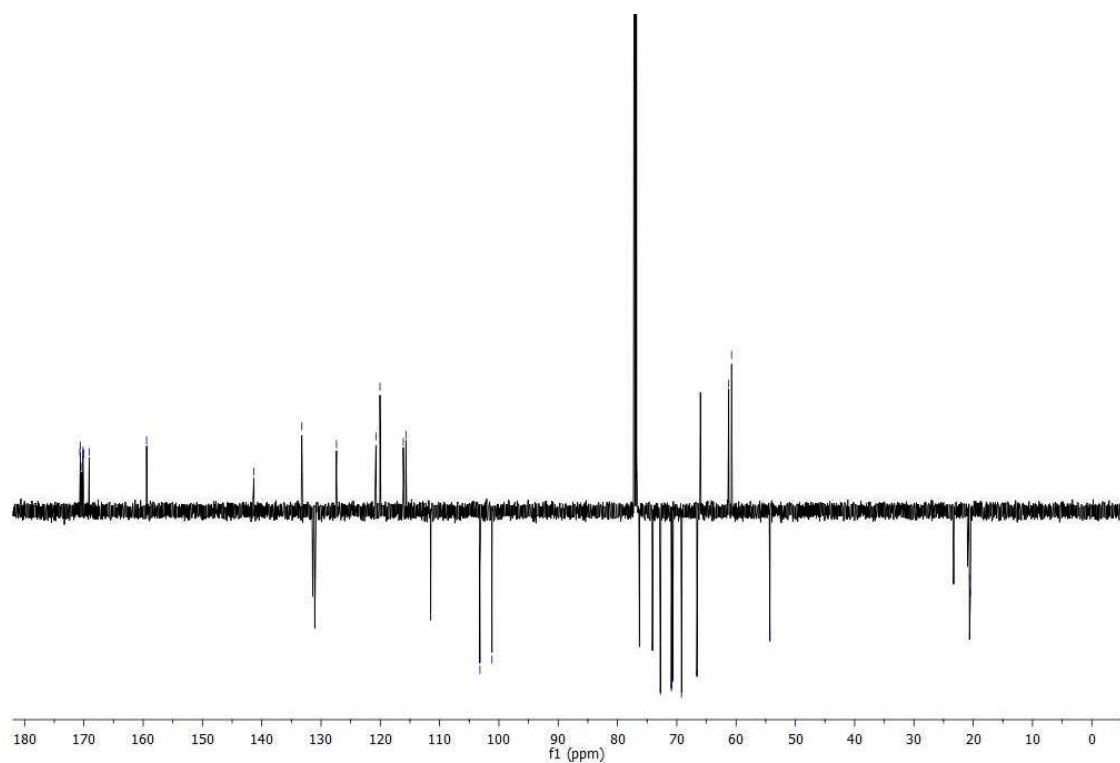

**(*N*-Acetyl-5-bromo-4-chloro-indox-3-yl) 2-Acetamido-4,6-di-*O*-acetyl-2-deoxy-3-  
*O*-(2,3,4,6-tetra-*O*-acetyl- $\beta$ -D-galactopyranosyl)- $\beta$ -D-glucopyranoside (7a)**

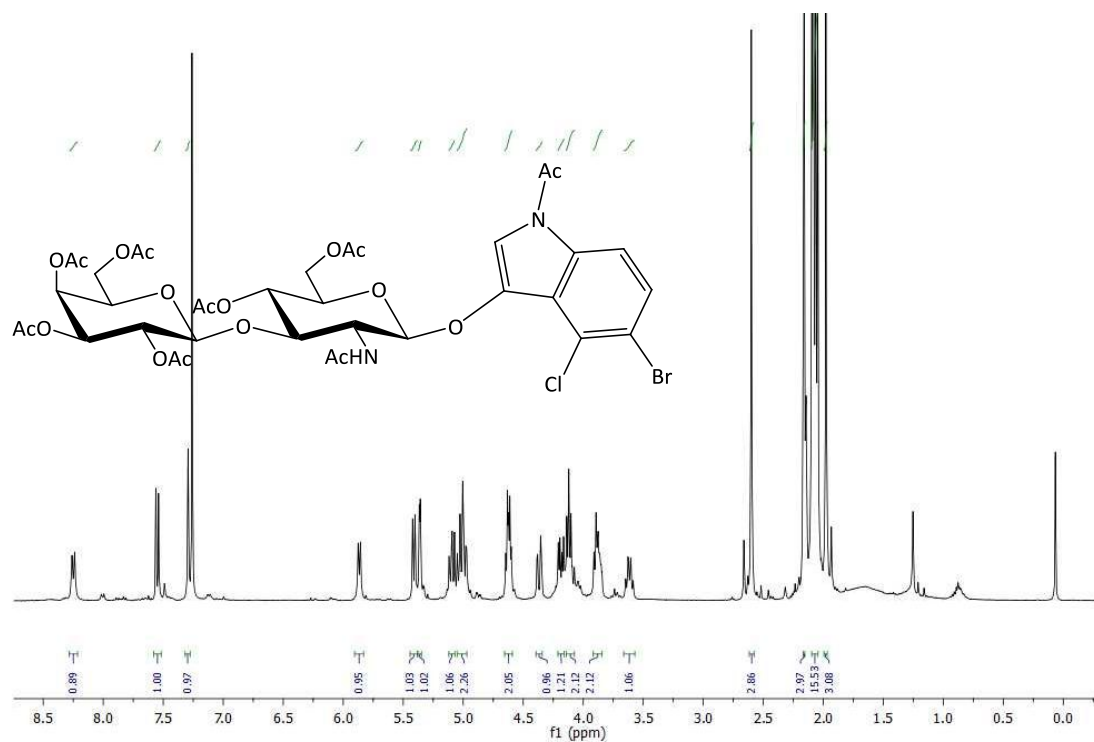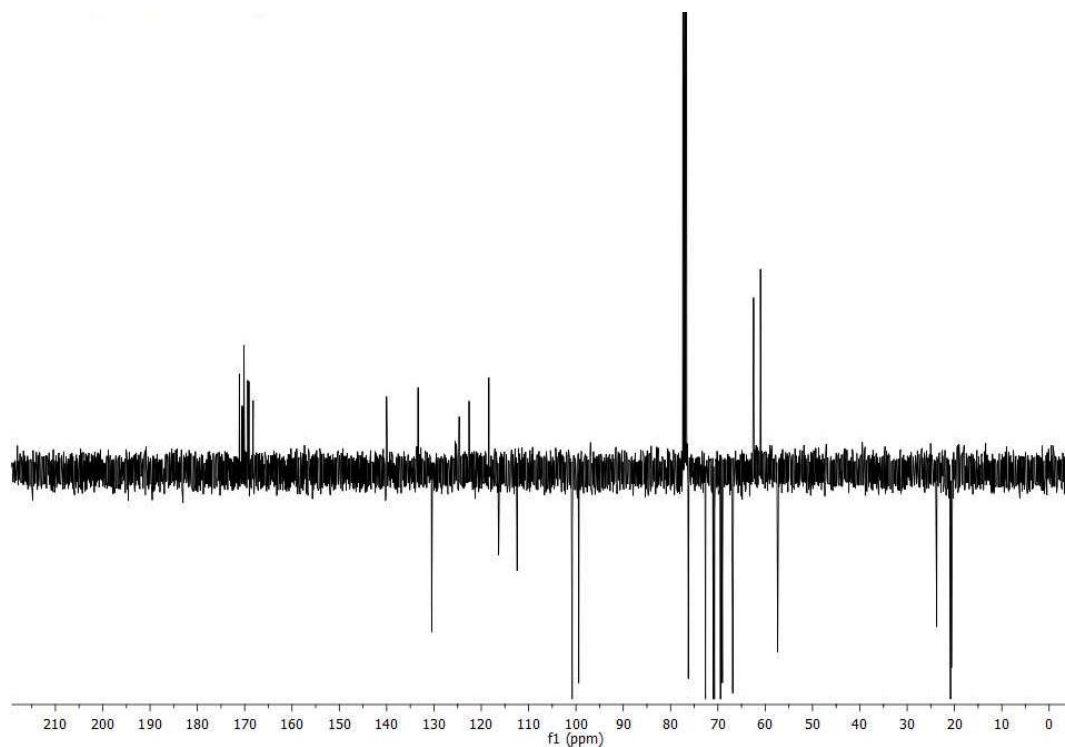

**(*N*-Acetyl-5-bromo-4-chloro-indox-3-yl) 2-Acetamido-3,6-di-*O*-acetyl-2-deoxy-4-*O*-(2,3,4,6-tetra-*O*-acetyl- $\beta$ -D-galactopyranosyl)- $\beta$ -D-glucopyranoside (7b)**

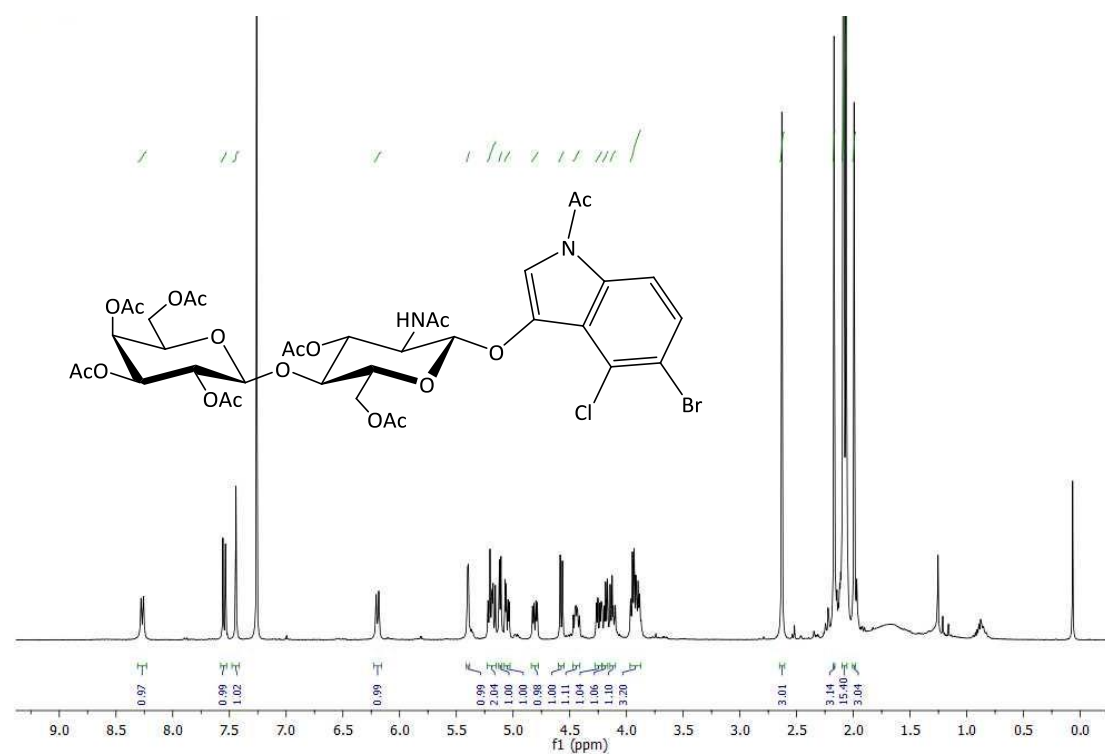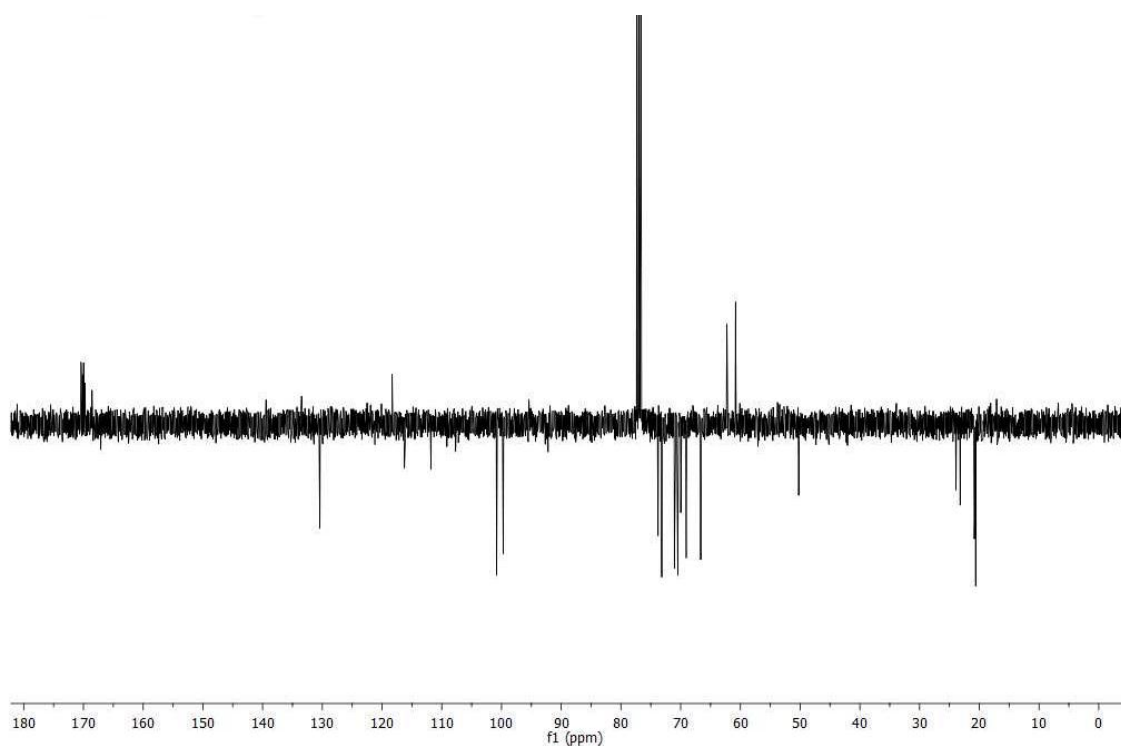

**(5-Bromo-4-chloro-indox-3-yl) 2-Acetamido-2-deoxy-3-O-(β-D-galactopyranosyl)-β-D-glucopyranoside (8a)**

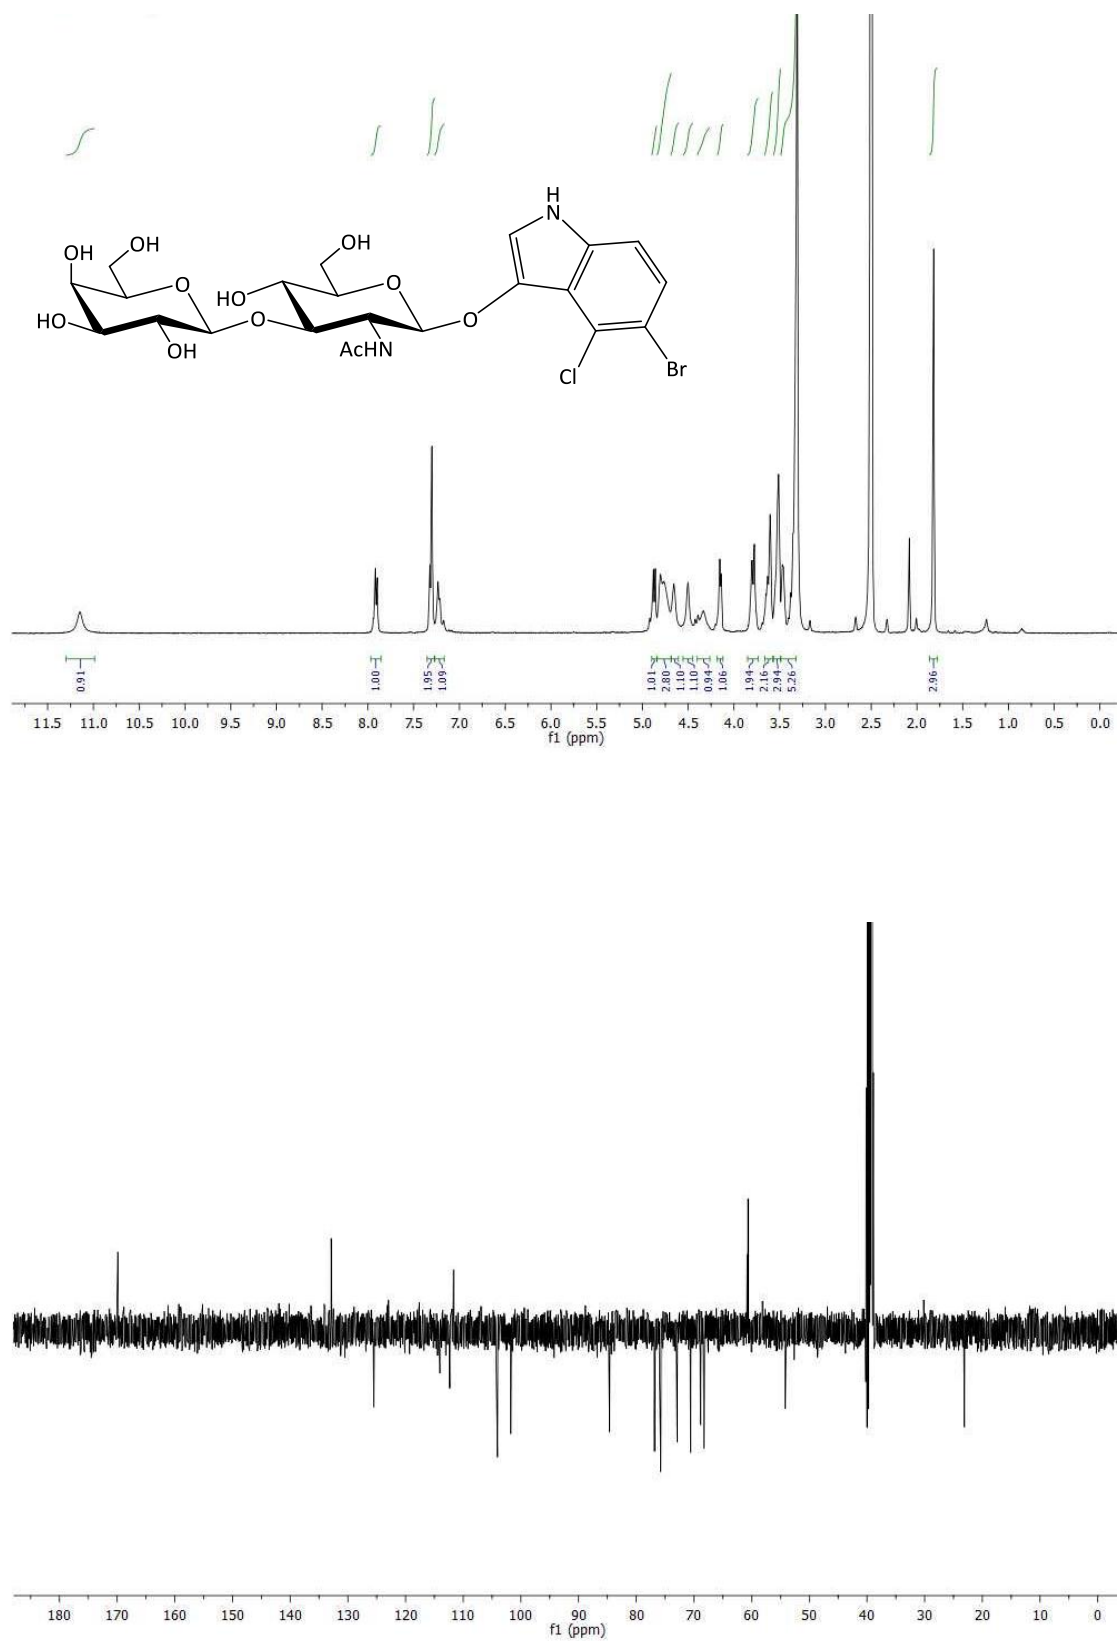

**(5-Bromo-4-chloro-indox-3-yl) 2-Acetamido-2-deoxy-4-O-( $\beta$ -D-galactopyranosyl)- $\beta$ -D-glucopyranoside (8b)**

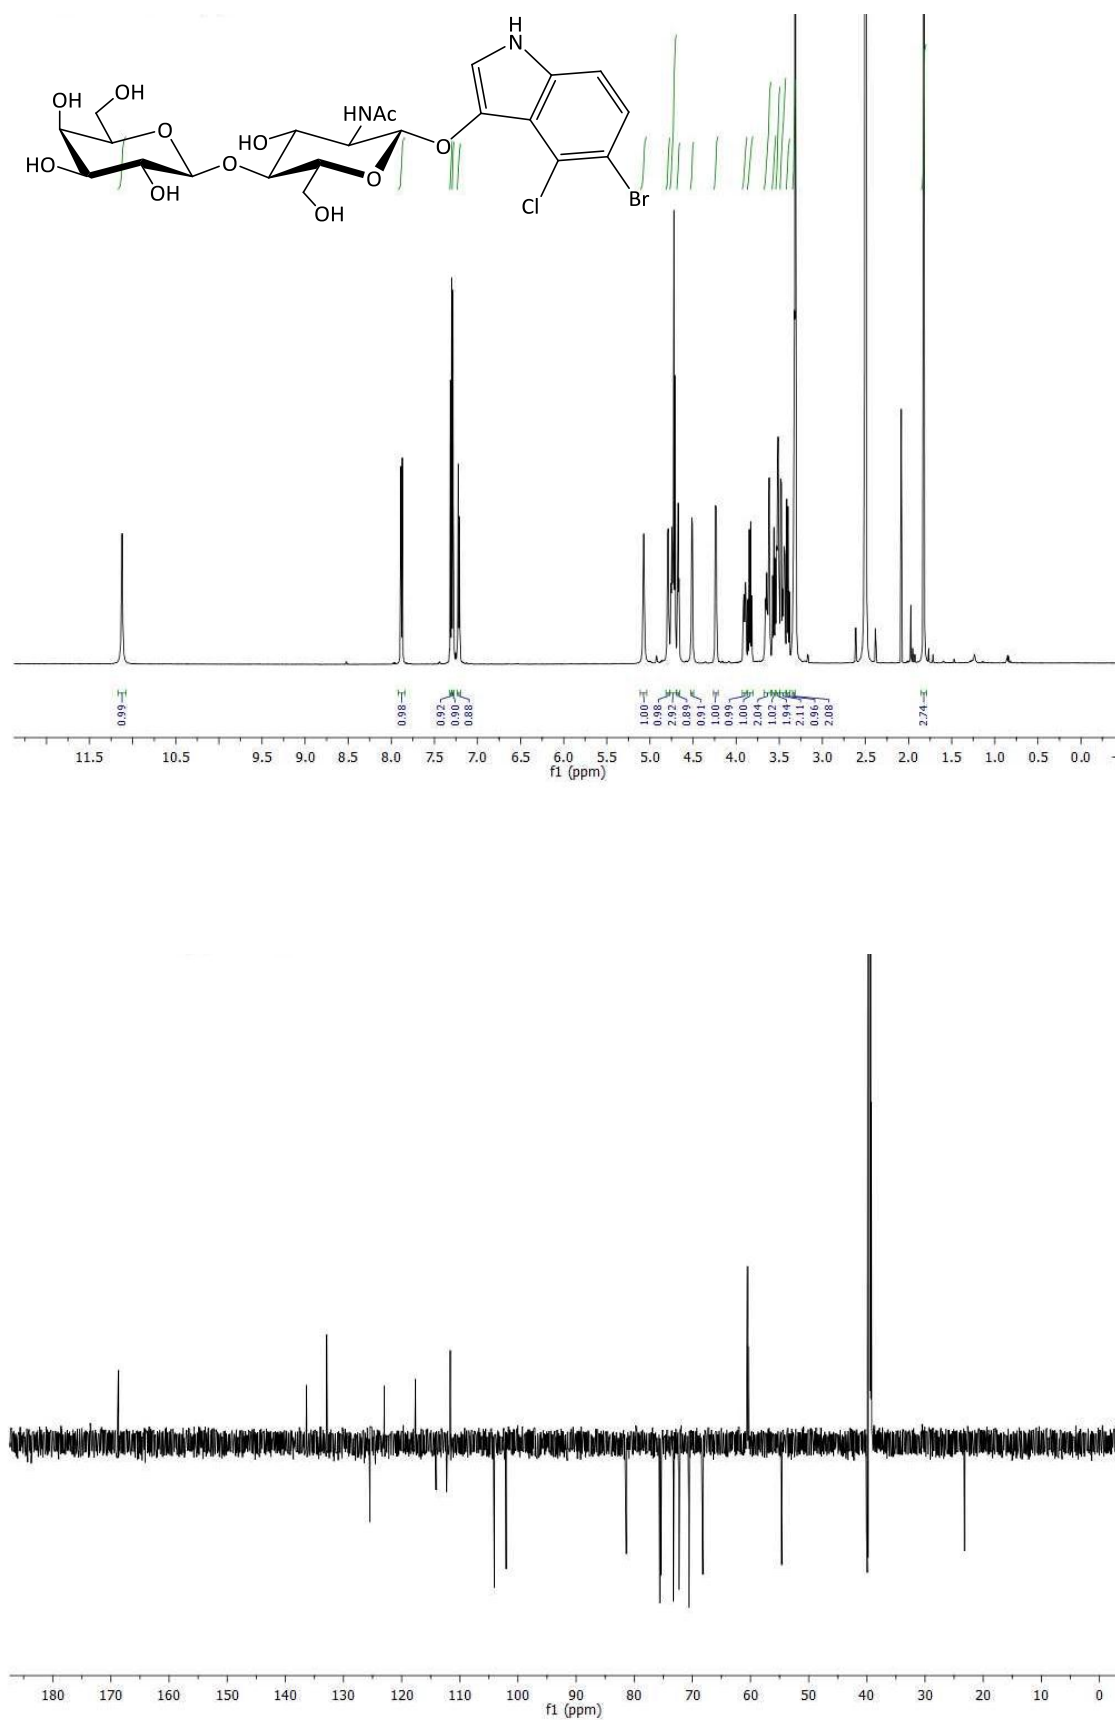

Supplement: c3ra47128d.pdf [file c3ra47128d.pdf]
